# Supplementary material
Source: Research Square preprint supplement (doi:10.21203/rs.3.rs-8821564/v1)
Supplement: Supplementary file 1 [file 3f441da54d9d13e643fc94e6.docx]

**Table S1.** Values of LOD and LOQ for Elements Determined in Agricultural Cereal Plant Powder Samples Using ICP-OES and Kjeldahl Methods

| Analyte | Unit | ICP-OES λ (nm) | LOD | LOQ | Analytical instrument |
| --- | --- | --- | --- | --- | --- |
| N | % (m/m) | - | 0,005 | 0,02 | Kjeldahl method |
| P | % (m/m) | 213.618 | 0,005 | 0,02 | ICP-OES |
| K | % (m/m) | 766.491 | 0,007 | 0,02 | ICP-OES |
| Ca | % (m/m) | 315.887 | 0,015 | 0,05 | ICP-OES |
| Mg | % (m/m) | 279.553 | 0,006 | 0,02 | ICP-OES |
| Na | mg.kg⁻¹ | 589.592 | 7,20 | 24 | ICP-OES |
| Cu | mg.kg⁻¹ | 324.754 | 0,54 | 1,80 | ICP-OES |
| Mn | mg.kg⁻¹ | 257.610 | 1,50 | 5,00 | ICP-OES |
| Fe | mg.kg⁻¹ | 238.204 | 2,40 | 8,00 | ICP-OES |
| Zn | mg.kg⁻¹ | 213.857 | 0,63 | 2,10 | ICP-OES |
| B | mg.kg⁻¹ | 249.772 | 0,60 | 2,00 | ICP-OES |
