# Supplementary material
Source: Research Square preprint supplement (doi:10.21203/rs.3.rs-8821564/v1)
Supplement: Supplementary file 2 [file 4d181405a4f36b73e6943d8c.docx]

**Table S3.** Long-term stability of CPP-23

| **Analyte** | **tcalc** | **uslt** | **Units** | **t_critical** |
| --- | --- | --- | --- | --- |
| N | 0.0735 | 0.0726 | % (m/m) | 3.1824 |
| P | 1.1093 | 0.0022 | % (m/m) | 3.1824 |
| K | 0.2535 | 0.0340 | % (m/m) | 3.1824 |
| Ca | 0.3487 | 0.0084 | % (m/m) | 3.1824 |
| Mg | 0.1604 | 0.0057 | % (m/m) | 3.1824 |
| Cu | 0.7119 | 0.1014 | mg.kg⁻¹ | 3.1824 |
| Fe | 0.2825 | 2.6130 | mg.kg⁻¹ | 3.1824 |
| Mn | 0.1323 | 0.6006 | mg.kg⁻¹ | 3.1824 |
| Zn | 0.2548 | 0.9567 | mg.kg⁻¹ | 3.1824 |
| Na | 1.1450 | 26.0 | mg.kg⁻¹ | 3.1824 |
| B | 0.0640 | 0.1876 | mg.kg⁻¹ | 3.1824 |
|  |  |  |  |  |
