# Supplementary material
Source: Research Square preprint supplement (doi:10.21203/rs.3.rs-8821564/v1)
Supplement: Supplementary file 3 [file 7f47157e2ba50a887ed2ccec.docx]

**Table S4** : Assigned values and characterization uncertainties ()

| Analyte | Assigned value |  | Unit | Relative (%) |
| --- | --- | --- | --- | --- |
| N | 1,89 | 0,018 | % (m/m) | 0,93% |
| P | 0,22 | 0,002 | % (m/m) | 0,84% |
| K | 1,73 | 0,015 | % (m/m) | 0,85% |
| Ca | 0,35 | 0,005 | % (m/m) | 1,46% |
| Mg | 0,13 | 0,002 | %(m/m) | 1,19% |
| Cu | 4,99 | 0,044 | mg.kg⁻¹ | 0,89% |
| Fe | 82,83 | 1,61 | mg.kg⁻¹ | 1,94% |
| Mn | 39,15 | 0,421 | mg.kg⁻¹ | 1,08% |
| Zn | 28,17 | 0,668 | mg.kg⁻¹ | 2,37% |
| Na | 1474 | 48,8 | mg.kg⁻¹ | 3,31% |
| B | 4,95 | 0,061 | mg.kg⁻¹ | 1,24% |
