# Supplementary material
Source: Research Square preprint supplement (doi:10.21203/rs.3.rs-8821564/v1)
Supplement: Supplementary file 4 [file fcf5ed06eaa493d056c96af2.docx]

**Table S2.** Evaluation of method trueness for WEPAL IPE 182 CRM (n = 3, df = 2, tcrit = 4.303)

| Analyte | Reference  CRM | Certified Value  ± U | Measured value ± U | Zeta‑score | Unit | t-value | Δm | UΔ | Δm ≤UΔ |
| --- | --- | --- | --- | --- | --- | --- | --- | --- | --- |
| N | WEPAL IPE 182 | 1.45 ± 0.0069 | 1.43 ± 0.0084 | 1,85 | % (m/m) | 3.19 | 0,0200 | 0,0108 | Satisfied |
| P | WEPAL IPE 182 | 0.346 ± 0.0015 | 0.345 ± 0.0023 | 0,37 | % (m/m) | 0.63 | 0,0010 | 0,0027 | Satisfied |
| K | WEPAL IPE 182 | 0.444 ± 0.0024 | 0.446 ± 0.0036 | -0,46 | % (m/m) | 0.8 | -0,0020 | 0,0043 | Satisfied |
| Ca | WEPAL IPE 182 | 0.073 ± 0.0007 | 0.073 ± 0.0102 | -0,16 | % (m/m) | 0 | -0,0002 | 0,0012 | Satisfied |
| Mg | WEPAL IPE 182 | 0.120 ± 0.0006 | 0.119 ± 0.0009 | 0,9 | % (m/m) | 1.6 | 0,0010 | 0,0011 | Satisfied |
| Na | WEPAL IPE 182 | 49.5 ± 1.74 | 50.4 ± 1.81 | -0,36 | mg.kg⁻¹ | 0.62 | -0,9000 | 2,5107 | Satisfied |
| Cu | WEPAL IPE 182 | 4.17 ± 0.035 | 4.18 ± 0.050 | -0,16 | mg.kg⁻¹ | 0.28 | -0,0100 | 0,0606 | Satisfied |
| Fe | WEPAL IPE 182 | 166 ± 1.46 | 165 ± 2.08 | 0,39 | mg.kg⁻¹ | 0.68 | 1,0000 | 2,5413 | Satisfied |
| Mn | WEPAL IPE 182 | 12.4 ± 0.102 | 12.3 ± 0.146 | 0,56 | mg.kg⁻¹ | 0.97 | 0,1000 | 0,1781 | Satisfied |
| Zn | WEPAL IPE 182 | 27.4 ± 0.151 | 27.1 ± 0.215 | 1,14 | mg.kg⁻¹ | 1.98 | 0,3000 | 0,2627 | Satisfied |
| B | WEPAL IPE 182 | 1.44 ± 0.082 | 1.5 ± 0.091 | -0,49 | mg.kg⁻¹ | 0.85 | -0,0600 | 0,1228 | Satisfied |

Δm = |Xm − Xcert|; UΔ = √(Um² + Ucert²). The condition Δm ≤ UΔ confirms statistical consistency at the 95% confidence level.
